# Supplementary material for: Long-cycled Li2ZnTi3O8/TiO2 composite anode material synthesized via a one-pot co-precipitation method for lithium ion batteries
Source: Royal Society of Chemistry journal article supplement (doi:10.1039/c6nj02760a), 2016-12-16
Supplement: c6nj02760a1.pdf [file c6nj02760a1.pdf]

Electronic Supplementary Information for  
**Long-cycled  $\text{Li}_2\text{ZnTi}_3\text{O}_8/\text{TiO}_2$  composites anode material synthesized via one pot  
co-precipitation method for lithium ion batteries**

Hua Li <sup>a,1,\*</sup>, Zhoufu Li <sup>b,1</sup>, Yanhui Cui <sup>c</sup>, Chenxiang Ma <sup>b</sup>, Zhiyuan Tang <sup>b,\*\*</sup>

\*Corresponding authors. E-mail:

[hli0820@163.com](mailto:hli0820@163.com); [zytang46@163.com](mailto:zytang46@163.com)

New Journal of Chemistry

13<sup>th</sup> December, 2016

Table. S1 references about the modification or composite anodes of  $\text{Li}_2\text{ZnTi}_3\text{O}_8$ 

|                                                            | The last               |        | The last                  |        | The last                  |        | Reference |
|------------------------------------------------------------|------------------------|--------|---------------------------|--------|---------------------------|--------|-----------|
|                                                            | charge                 | Cycle  | charge                    | Cycle  | charge                    | Cycle  |           |
|                                                            | capacity               | number | capacity                  | number | capacity                  | number |           |
|                                                            | $1000\text{mA g}^{-1}$ |        | $2000\text{mA g}^{-1}$    |        | $3000\text{mA g}^{-1}$    |        |           |
| $\text{Li}_2\text{ZnTi}_3\text{O}_8/\text{TiO}_2$          | 150.6                  |        | 137.2                     |        | 108.2                     |        | This      |
|                                                            | $\text{mAh g}^{-1}$    | 1000   | $\text{mAh g}^{-1}$       | 1000   | $\text{mAh g}^{-1}$       | 1000   | work      |
| $\text{Li}_2\text{ZnTi}_3\text{O}_8/\text{C}@\text{Cu}$    | 124.4                  |        | 90                        |        | 79.1                      |        | [1]       |
|                                                            | $\text{mAh g}^{-1}$    | 1000   | $\text{mAh g}^{-1}$       | 1000   | $\text{mAh g}^{-1}$       | 1000   |           |
| Sol-gel $\text{Li}_2\text{ZnTi}_3\text{O}_8$               | 150                    |        | 90.9                      |        | 71.2                      |        | [2]       |
|                                                            | $\text{mAh g}^{-1}$    | 1000   | $\text{mAh g}^{-1}$       | 1000   | $\text{mAh g}^{-1}$       | 1000   |           |
| $\text{Li}_2\text{ZnTi}_3\text{O}_8/\text{C}$              | 190                    |        | $160.5\text{mAhg}^{-1}$   |        | $135\text{mAh g}^{-1}$    |        |           |
|                                                            | $\text{mAh g}^{-1}$    | 100    | $(3000\text{ mA g}^{-1})$ | 100    | $(4000\text{ mA g}^{-1})$ | 100    | [3]       |
| $\text{Li}_2\text{ZnTi}_3\text{O}_8^*$                     | 190.7                  |        | 160.5                     |        | 141.5                     |        |           |
|                                                            | $\text{mAh g}^{-1}$    | 300    | $\text{mAh g}^{-1}$       | 300    | $\text{mAh g}^{-1}$       | 300    | [4]       |
| $\text{Li}_2\text{ZnTi}_3\text{O}_8$                       | 165                    |        | 150                       |        | 100                       |        |           |
|                                                            | $\text{mAh g}^{-1}$    | 200    | $\text{mAh g}^{-1}$       | 100    | $\text{mAh g}^{-1}$       | 100    | [5]       |
|                                                            |                        |        | $(2.5\text{A g}^{-1})$    |        | $(5\text{ A g}^{-1})$     |        |           |
| Cu-Graphite-Au-                                            | 220.7                  |        | 196.1                     |        | 180.9                     |        | [6]       |
| $\text{Li}_2\text{ZnTi}_3\text{O}_8$                       | $\text{mAh g}^{-1}$    | 200    | $\text{mAh g}^{-1}$       | 250    | $\text{mAh g}^{-1}$       | 450    |           |
| $\text{Li}_2\text{ZnTi}_3\text{O}_8/\text{La}_2\text{O}_3$ |                        |        | 76.3                      |        | 104                       |        | [7]       |
|                                                            |                        |        | $\text{mAh g}^{-1}$       | 1000   | $\text{mAh g}^{-1}$       | 100    |           |

\*: The discharge current density is  $300\text{mA g}^{-1}$ , and the charge current density is  $1000\text{mA g}^{-1}$ ,  $2000\text{mA g}^{-1}$  and  $3000\text{mA g}^{-1}$ , respectively.

1 H. Tang, Y. Zhou, L. Zan, N. Zhao, Z. Tang, *Electrochim. Acta*, **2016**, **191**, 887–894.

2 T. Liu, H. Tang, L. Zan, Z. Tang, *J. Electroanal. Chem.*, **2016**, **771**, 10–16.

3 L. Wang, B. Chen, Z. Meng, B. Luo, X. Wang, Y. Zhao, *Electrochim. Acta*, **2016**, **188**, 135–144.

4 Z. Li, Y. Cui, J. Wu, C. Du, X. Zhang, Z. Tang, *RSC Adv.*, **2016**, **6**, 39209–39215.

5 L. Wang, Z. Meng, H. Wang, X. Li, G. Zhang, *Ceram. Int.*, **2016**, **42**, 16872–16881.

6 X. Li, L. Wang, C. Li, B. Chen, Q. Zhao, G. Zhang, *J. Power Sources*, **2016**, **308**, 65–74.

7 H. Tang, L. Zan, J. Zhu, Y. Ma, N. Zhao, Z. Tang, *J. Alloys Compd.*, **2016**, **667**, 82–90.
